# Supplementary material for: Subcellular spatial segregation of integrin subtypes by patterned multicomponent surfaces
Source: Royal Society of Chemistry journal article supplement (doi:10.1039/c0ib00129e), 2011-01-01
Supplement: c0ib00129e.pdf [file c0ib00129e.pdf]

## Supplemental Figure 1

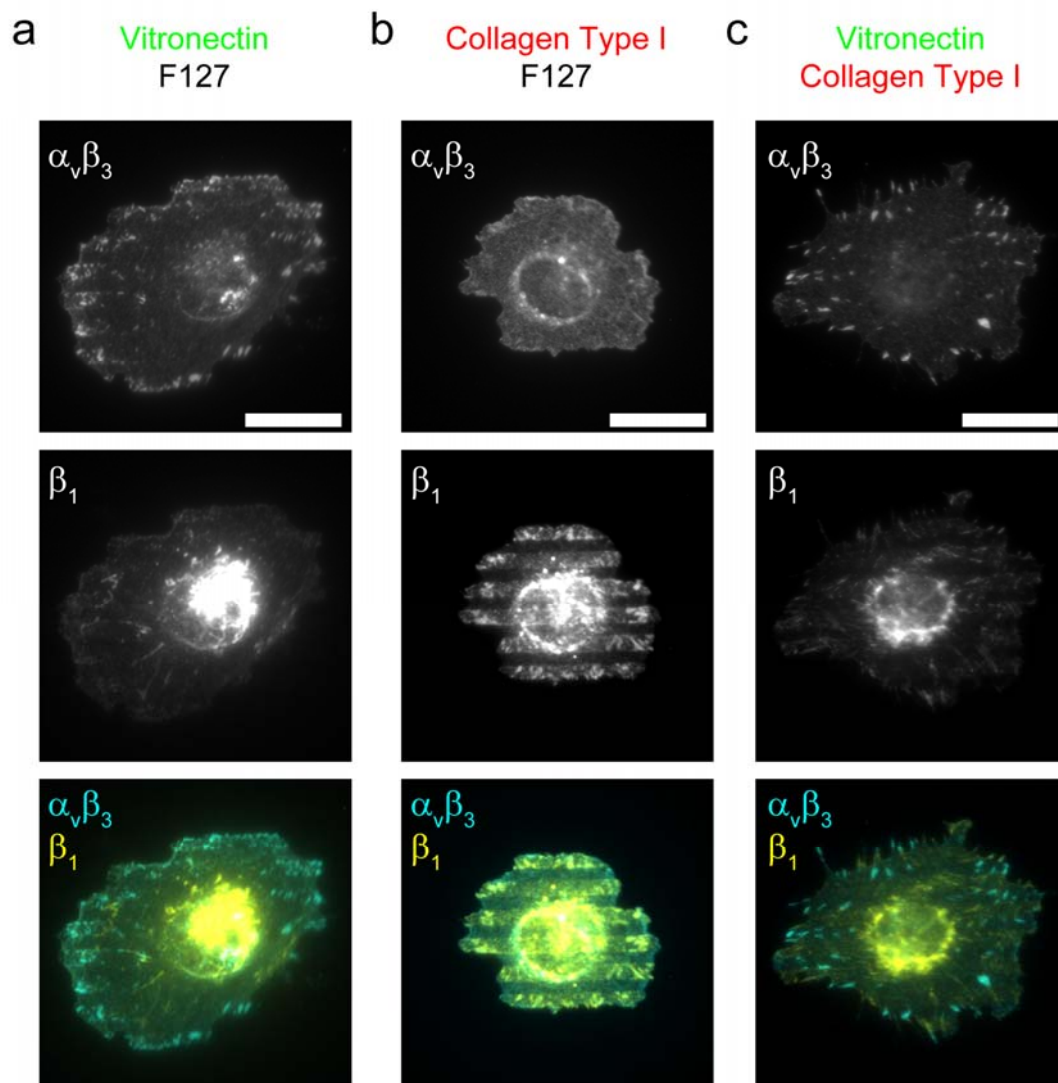

**Supplementary Fig. 1. Integrin segregation on multicolor surface patterns.**

(a-c) Micrographs of human umbilical vein endothelial cells (HUVECs), seeded on substrates patterned as in Figure 3 (a-c), fixed after 1 h, and immunolabeled. Note the colocalization of  $\alpha_v\beta_3$  integrin to vitronectin, and  $\beta_1$  integrin to collagen type I. All scale bars, 20  $\mu\text{m}$ .

## Supplemental Figure 2

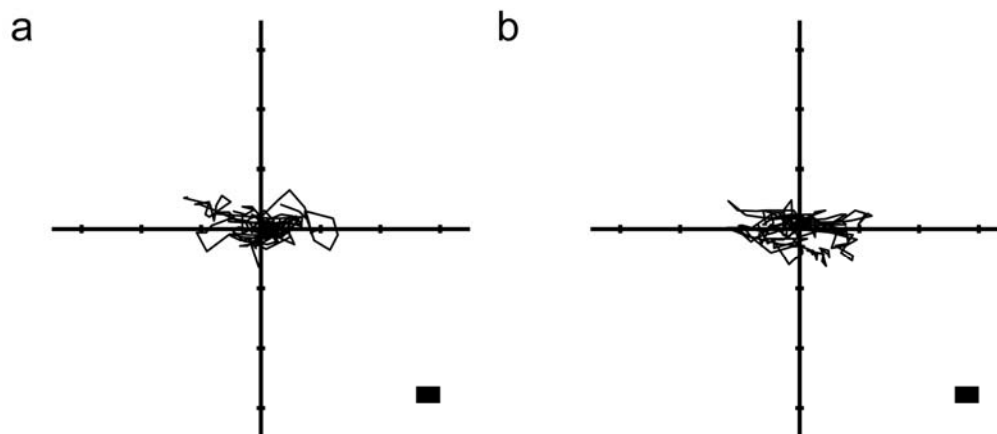

**Supplementary Fig. 2. Adhesive geometry guides cell migration.**

(a, b) Representative migration trajectories of cells on substrates patterned with stripes of vitronectin (a) and type-I collagen (b), as in Fig. 3a and 3b respectively. Each black line represents a single cell, originating from (0,0) with a 10 min time interval, and a 4-6 h tracking period. 6 cells are plotted per graph.
